# Supplementary material
Source: publisher figshare collection journal article supplement (https://future-science-group.figshare.com/articles/dataset/_/22099820)
Supplement: Supplementary file 1 [file 1]

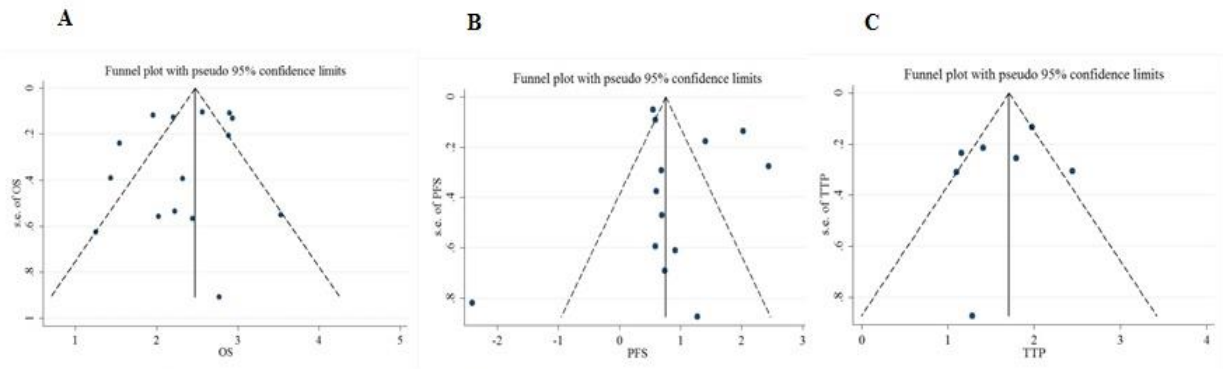

**Figure S1:** Funnel plot with pseudo 95% confidence interval. A (OS), B (PFS), C (TTP) . The funnel plots did not reveal any evidence of publication bias in overall analysis of TTP, whereas significant publication bias was observed in the meta-analysis of OS and PFS.

**Table S1.** Subgroup analysis of overall survival (OS), progression-free survival (PFS), time to progression (TTP) and overall response rate (ORR) according to types of cancer

| Cancer                      |               | OS                 |                |               | PFS               |                |               | TTP               |                |               | ORR               |                |
|-----------------------------|---------------|--------------------|----------------|---------------|-------------------|----------------|---------------|-------------------|----------------|---------------|-------------------|----------------|
|                             | No.of Studies | Months (95% CI)    | I <sup>2</sup> | No.of Studies | Months (95% CI)   | I <sup>2</sup> | No.of Studies | Months (95% CI)   | I <sup>2</sup> | No.of Studies | Months (95% CI)   | I <sup>2</sup> |
| <b>Breast</b>               | 1             | 8.06 (1.62-14.49)  | 0.0%           | -             | -                 | -              | -             | -                 | -              | -             | -                 | -              |
| <b>HCC</b>                  | 3             | 13.79 (7.29-20.30) | 61.3%          | 3             | 2.01 (0.65-3.37)  | 0.0%           | 4             | 3.35 (2.44-4.26)  | 0.0%           | 4             | 0.88 (0.79-0.97)  | 96.9%          |
| <b>Glioma</b>               | 5             | 12.24 (7.60-16.88) | 87.9%          | 3             | 4.26 (1.45-7.07)  | 96.4%          | 1             | 7.62 (5.12-10.12) | 7.0%           | 5             | 0.71 (0.65-0.76)  | 99.6%          |
| <b>Pancreas</b>             | 1             | 6.85 (2.54-11.7)   | 86.6%          | 2             | 3.96 (2.66-5.26)  | 0.0%           | -             | -                 | -              | 2             | 0.76 (0.57-0.95)  | 93.2%          |
| <b>Urothelial</b>           | -             | -                  | -              | 1             | 1.80 (1.50-2.10)  | 0.0%           | -             | -                 | -              | 1             | 0.31 (0.25-0.37)  | 0.0%           |
| <b>Pleural Mesothelioma</b> | -             | -                  | -              | 1             | 1.74 (1.57-1.90)  | 0.0%           | -             | -                 | -              | 2             | 0.94 (0.83-1.05)  | 94.8%          |
| <b>Melanoma</b>             | -             | -                  | -              | 1             | 2.50 (-2.20-7.20) | 0.0%           | 1             | 6.00 (2.75-9.25)  | 0.0%           | 2             | 0.61 (-0.11-1.32) | 99.8%          |
| <b>Colorectal</b>           | 1             | 4.21 (0.50-7.92)   | 0.0%           | 1             | 1.84 (0.24-3.43)  | 0.0%           | -             | -                 | -              | 1             | 0.99 (0.98-1.00)  | 0.0%           |
